# Supplementary material for: Fully Inkjet-Printed Biosensors Fabricated with a Highly Stable Ink Based on Carbon Nanotubes and Enzyme-Functionalized Nanoparticles
Source: MDPI journal article supplement (doi:10.3390/nano11071645), 2021-06-23
Supplement: s1 [file s1]

## Supplementary Information

# Fully Inkjet-Printed Biosensors Fabricated with a Highly Stable Ink based on Carbon Nanotubes and Enzyme-Functionalized Nanoparticles

Mijal Mass <sup>1</sup>, Lionel S. Veiga <sup>1</sup>, Octavio Garate <sup>1</sup>, Gloria Longinotti <sup>1</sup>, Ana Moya <sup>2,†</sup>, Eloi Ramón <sup>2</sup>, Rosa Villa <sup>2,3</sup>, Gabriel Ybarra <sup>1,\*</sup> and Gemma Gabriel <sup>2,3,\*</sup>

<sup>1</sup> INTI-Micro y Nanotecnologías, Instituto Nacional de Tecnología Industrial (INTI), San Martín, Buenos Aires B1650WAB, Argentina; mmass@inti.gob.ar (M.M.); lveiga@inti.gob.ar (L.S.V.); ogarate@inti.gob.ar (O.G.); glonginotti@inti.gob.ar (G.L.)

<sup>2</sup> Institut de Microelectrònica de Barcelona, IMB-CNM (CSIC), Campus Universitat Autònoma de Barcelona, Cerdanyola del Vallès 08193, Barcelona, Spain; ana.moya@eurecat.org (A.M.); eloi.ramon@imb-cnm.csic.es (E.R.); rosa.villa@imb-cnm.csic.es (R.V.);

<sup>3</sup> CIBER de Bioingeniería, Biomateriales y Nanomedicina (CIBER-BBN), 28029 Madrid, Spain

\* Correspondence: gybarra@inti.gob.ar (G.Y.); gemma.gabriel@imb-cnm.csic.es (G.G.)

† Present Addresses: Eurecat, Centre Tecnològic de Catalunya, Functional Printing & Embedded Devices Unit, Mataró 08302, Spain

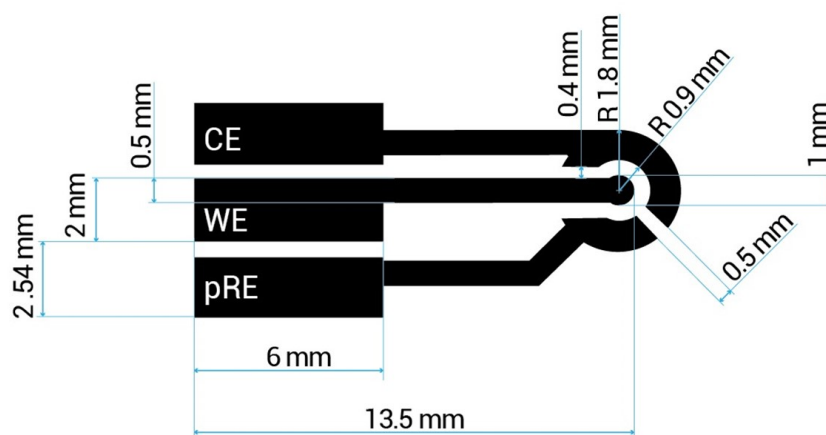

**Figure S1.** Design of printed working electrode (WE), counter electrode (CE), pseudo-reference electrode (pRE).

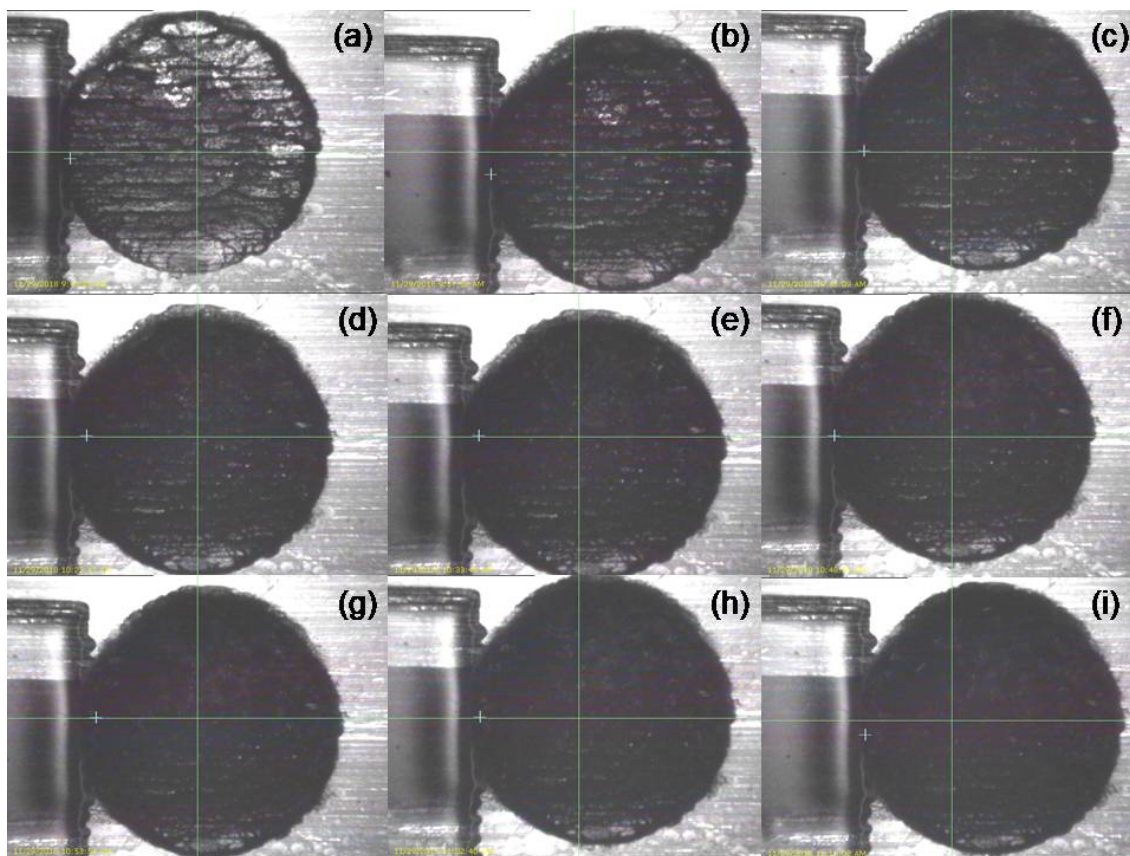

**Figure S2.** Images of a WE printed with different layers of the SWCNT-5 ink obtained with the camera of the DMP-2831: (a) 1-layer; (b) 3-layer; (c) 6-layer; (d) 7-layer; (e) 9-layer; (f) 12-layer; (g) 13-layer; (h) 15-layer and (i) 18-layer.

(a)

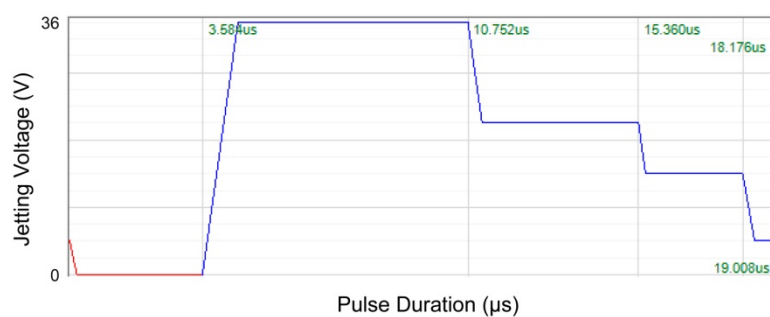

|                                 |                             |
|---------------------------------|-----------------------------|
| Print resolution / Drop spacing | 1693 dpi / 15 $\mu\text{m}$ |
| Maximum jetting frequency       | 5 KHz                       |
| Maximum jetting voltage         | 36 V                        |
| Maximum number of nozzles       | 2                           |

(b)

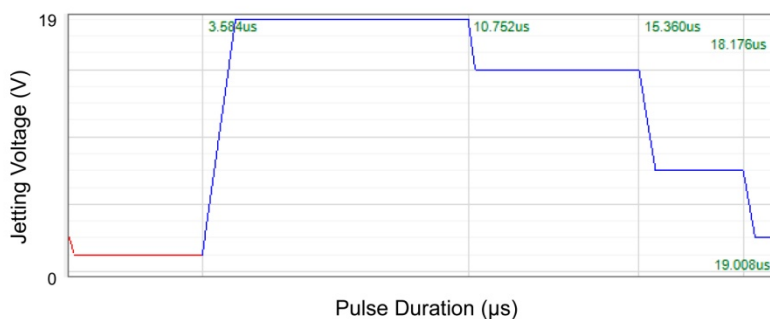

|                                 |                             |
|---------------------------------|-----------------------------|
| Print resolution / Drop spacing | 1693 dpi / 15 $\mu\text{m}$ |
| Maximum jetting frequency       | 5 KHz                       |
| Maximum jetting voltage         | 19 V                        |
| Maximum number of nozzles       | 7                           |

**Figure S3.** Waveform and parameters developed to fine-tune the drop ejection of the inkjet printhead for (a) SWCNT-7.5 and (b) SWCNT-5.

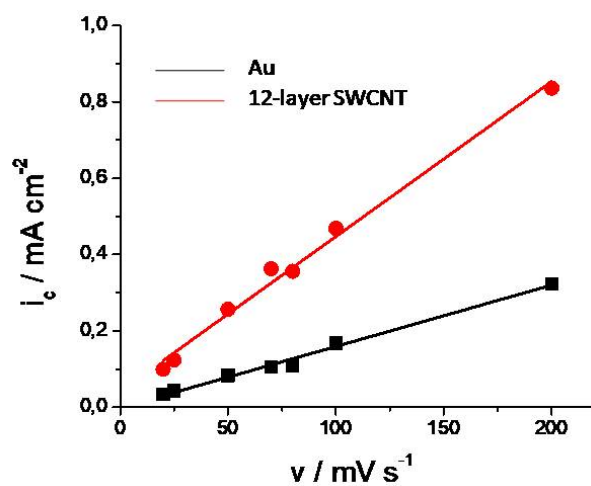

**Figure S4.** Plot of capacitive current vs. scan rate obtained for a Au printed electrode (black) and a 12-layer of 7.5 mg/ml concentration of SWCNT printed electrode (red).

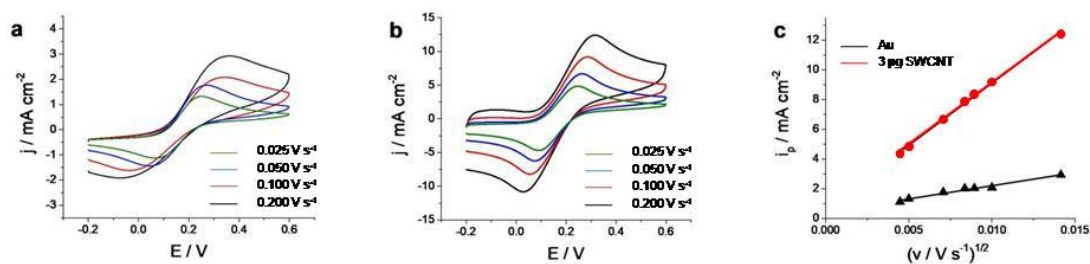

**Figure S5.** Cyclic voltammograms obtained for a printed electrode in solution of 10 mM hexacyanoferrate (III/II) in a 0.1 M KNO<sub>3</sub> at different scan rates of 0.025, 0.050, 0.100 and 0.200 V s<sup>-1</sup>: (a) Au; (b) with 3 µg of SWCNTs; (c) Randles-Sevcik plots.

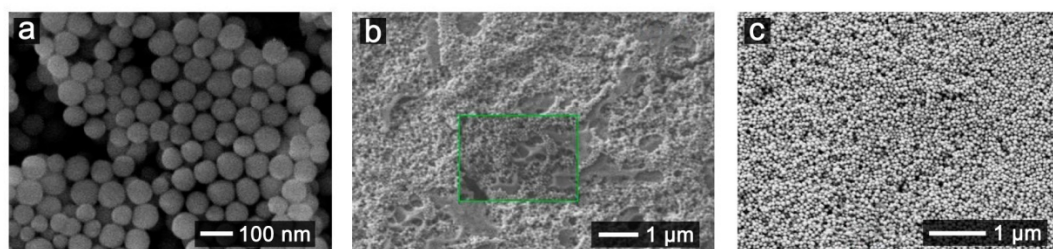

**Figure S6.** SEM images (a) of spherical SiO<sub>2</sub> nanoparticles with an average diameter of 90 nm prepared by a sol-gel process; (b) top view of surface WE printed with SWCNT-SNP-HRP ink with concentration of SNP-HRP lower to 1 mg/ml and (c) top view image of surface of 12-layer SWCNT-SNP-HRP (5 mg/ml of SWCNTs and 5 mg/ml of SNP-HRP) printed electrode.
